# Supplementary material
Source: publisher figshare collection journal article supplement (https://aacr.figshare.com/articles/dataset/_/23183888)
Supplement: Supplementary file 1 [file 40885004]

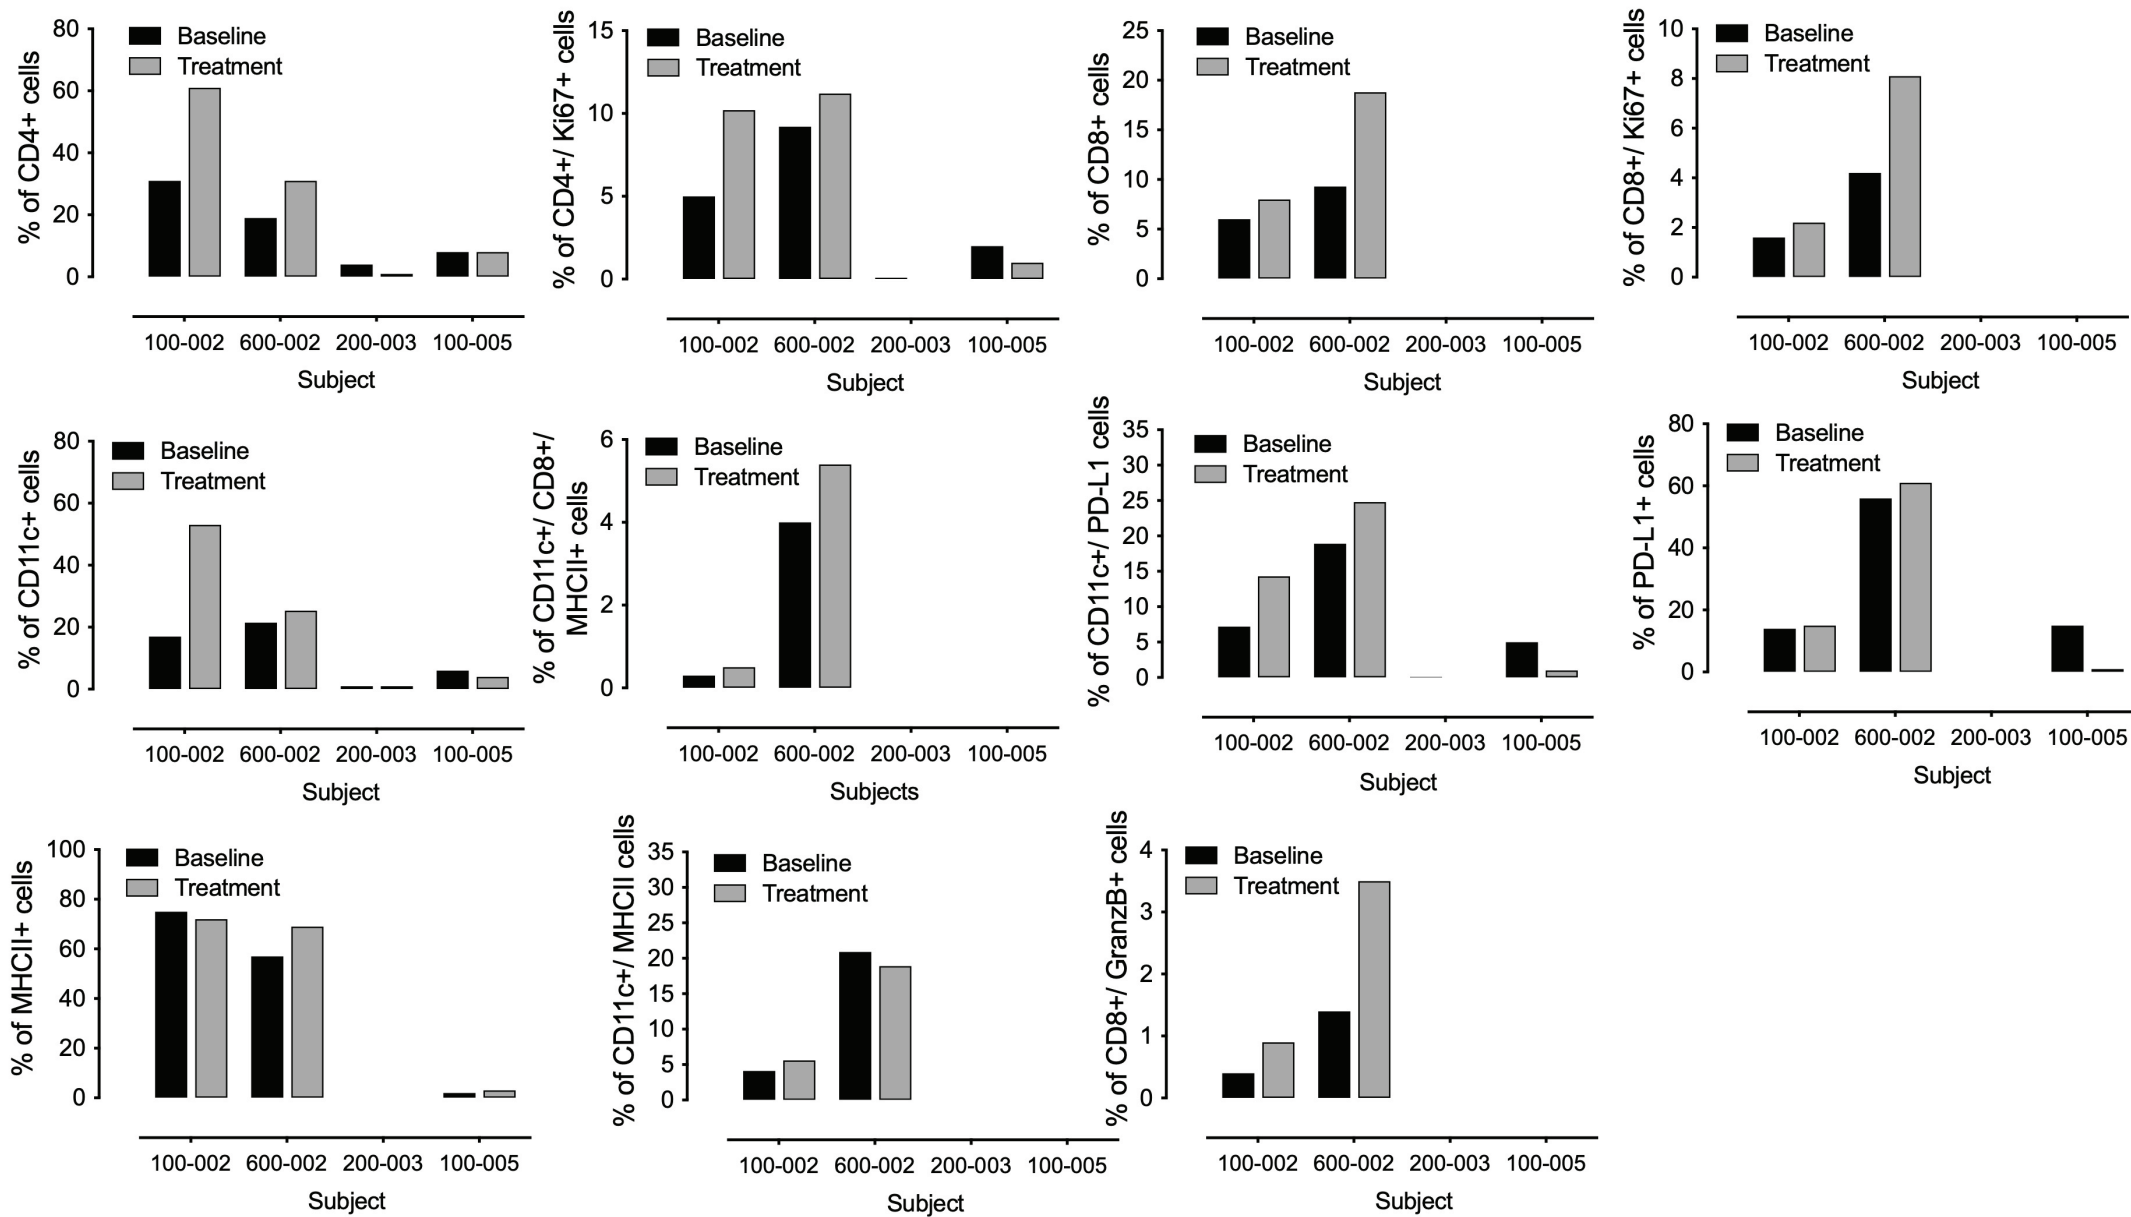

Supplemental Figure 7. Quantification of immune cell composition in selected tumors determined by immunofluorescence multi-plex assay. Tumor samples were collected at baseline and on day 22, seven days after the last SYN1891 treatment in cycle one. The percent positivity of each marker for tumors from four different patients are shown.
